# Supplementary material for: Gold-loaded nanoporous iron oxide nanocubes: a novel dispersible capture agent for tumor-associated autoantibody analysis in serum
Source: Royal Society of Chemistry journal article supplement (doi:10.1039/c7nr03006a), 2017-01-01
Supplement: c7nr03006a1.pdf [file c7nr03006a1.pdf]

## Electronic Supplementary Information (ESI)

### **Gold-Loaded Nanoporous Iron Oxide Nanocubes: A Novel Dispersible Capture Agent for Tumor-Associated Autoantibodies Analysis in Serum**

Sharda Yadav,<sup>a</sup> Mostafa Kamal Masud,<sup>b,c</sup> Md. Nazmul Islam,<sup>a,b</sup> Vinod Gopalan,<sup>d</sup> Alfred King-yin Lam,<sup>d</sup> Shunsuke Tanaka,<sup>e</sup> Nam-Trung Nguyen,<sup>b</sup> Md. Shahriar A. Hossain,<sup>c</sup> Cuiling Li<sup>e</sup>, Yusuke Yamauchi,<sup>\*c</sup> and Muhammad J. A. Shiddiky<sup>\*,a,b</sup>

## SUPPORTING FIGURE

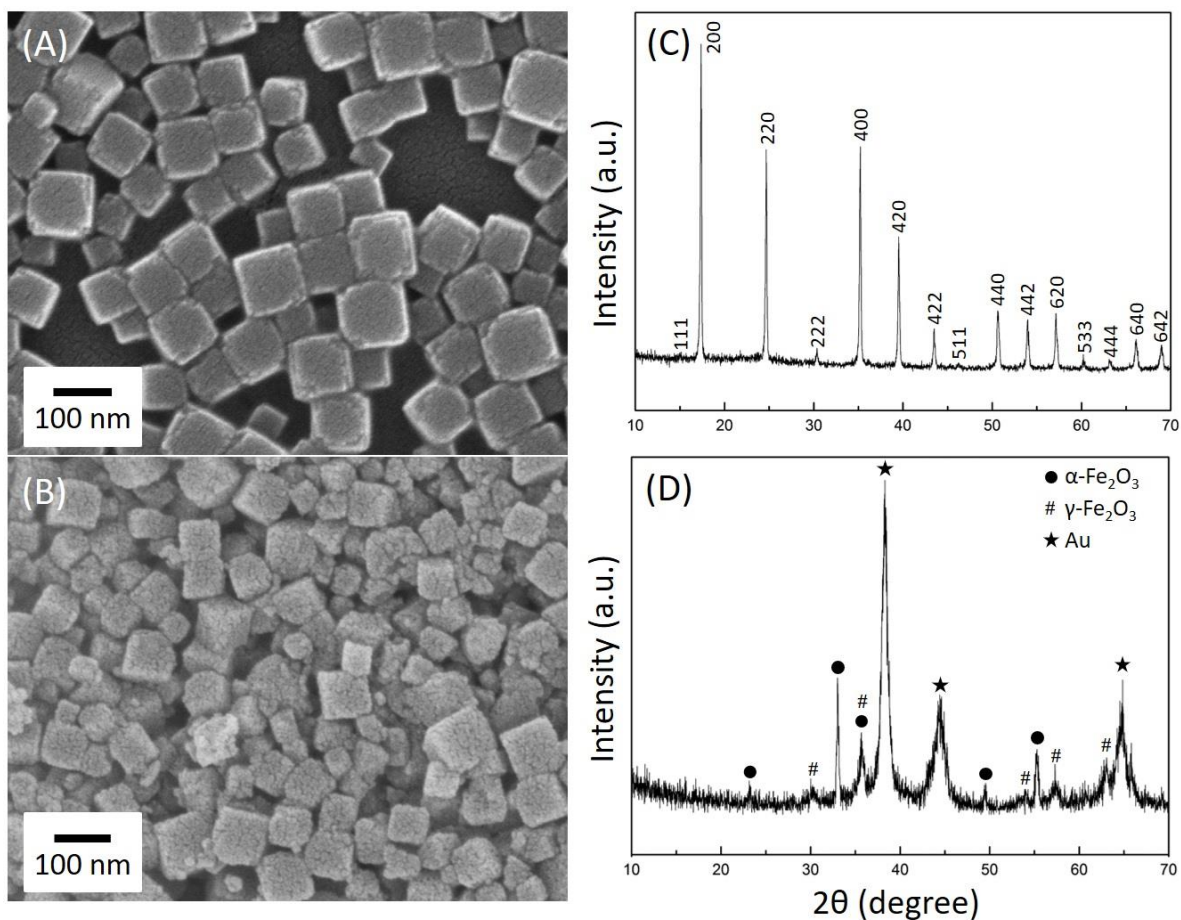

Fig S1: (A-B) SEM images of (A) PB nanocubes and (B) the calcined PB nanocubes. (C-D) Wide-angle XRD patterns of (C) PB nanocubes and (D) Au-loaded nanoporous iron oxide nanocubes.

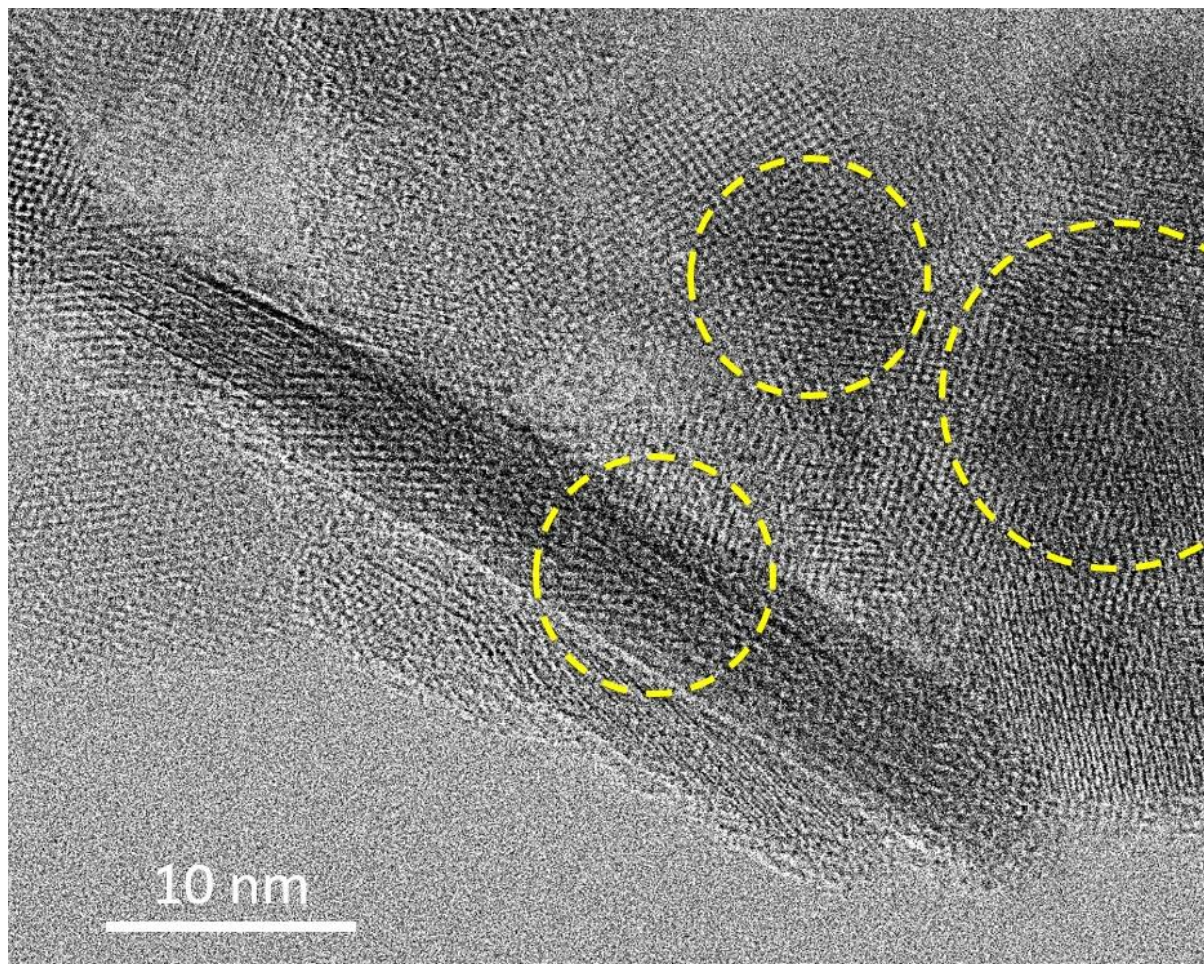

Fig. S2: High-resolution TEM image of Au-loaded nanoporous iron oxide nanocubes. The deposited Au nanoparticles are highlighted by circles.
